# Supplementary material
Source: PubMed Central journal article supplement (PMC4883655)
Supplement: NIHMS68252-supplement-Supplemental_Figures.pdf [file NIHMS68252-supplement-Supplemental_Figures.pdf]

SUPPLEMENTAL MATERIALS

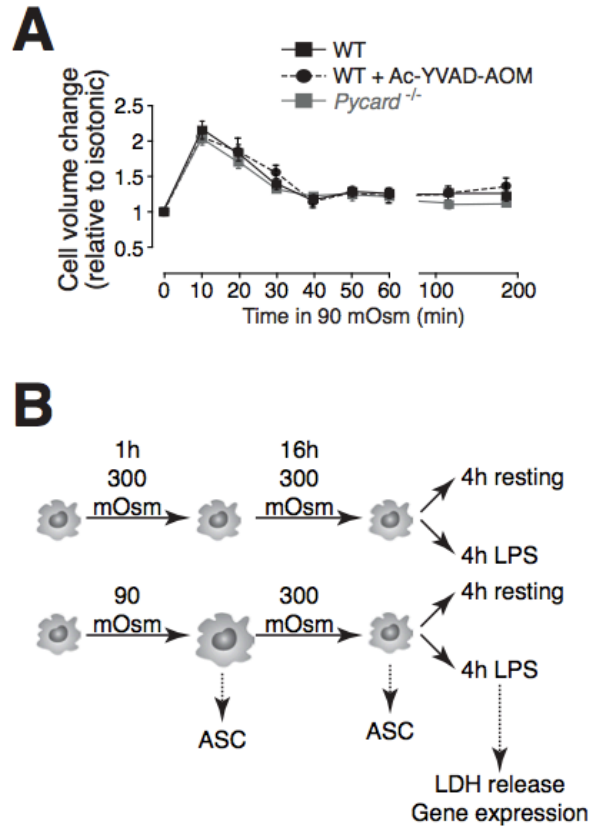

**Figure S1.** Cell swelling and RVD are independent on ASC or caspase-1 activity. **(A)** Relative cell area of immortalized bone marrow derived macrophages from wild type (WT) or ASC-deficient (*Pycard*<sup>-/-</sup>) mice incubated in hypotonic solution in the presence or absence of caspase-1 inhibitor (Ac-YVAD-AOM). Average and s.e.m. of  $n = 50$  cells/condition and representative of 3 independent experiments. **(B)** Experimental design to study long-term effects of ASC oligomerization.

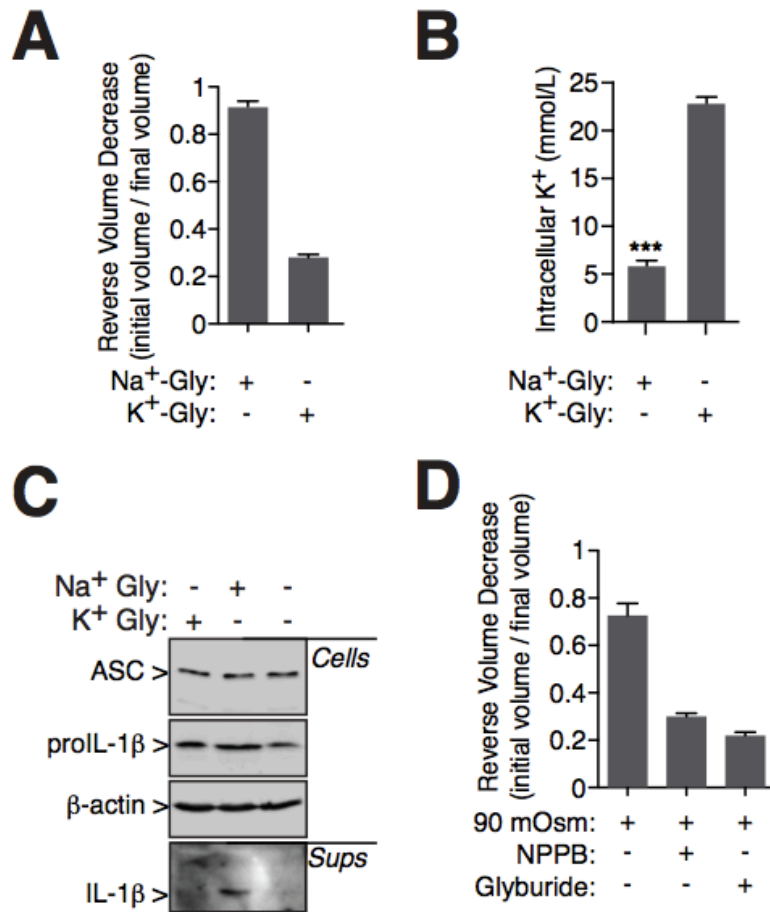

**Figure S2.** Regulatory volume decrease is blocked by high extracellular K<sup>+</sup>, NPPB and glyburide. **(A)** Regulatory volume decrease measured as the ratio of the initial cellular volume and the final cellular volume after 3 h treatment with different hypotonic solutions of THP-1 cells primed with LPS and IFN- $\gamma$  (100 ng/ml each, 16 h); hypotonic solutions were composed with: 120 mM glycerol with 140 mM of NaCl (Na<sup>+</sup>-Gly) or 140 mM of KCl (K<sup>+</sup>-Gly). **(B)** Relative intracellular K<sup>+</sup> concentration of THP-1 cells primed as in (A) but incubated for 1h in the presence of different solutions as indicated; data represent the average and s.e.m. of  $n = 3$  independent experiments; \*\*\* $p < 0.001$ . **(C)** Western blot analysis of the cleavage of pro-IL-1 $\beta$  to its active p17 form (IL-1 $\beta$ ) and of ASC from THP-1 activated as in (A). *Cells*: cell lysates, *Sups*: supernatants; Western blot representative of 3 different experiments. **(D)** Regulatory volume decrease ratio of THP-1 cells primed with LPS and IFN $\gamma$  (100 ng/ml each, 16 h) and incubated for 3 h with hypotonic solution in the presence or absence of NPPB (100  $\mu$ M) or Glyburide (100  $\mu$ M) as indicated. For (A) and (D), data represent average and s.e.m. of  $n = 50$  cells/condition and representative of at least 3 independent experiments.

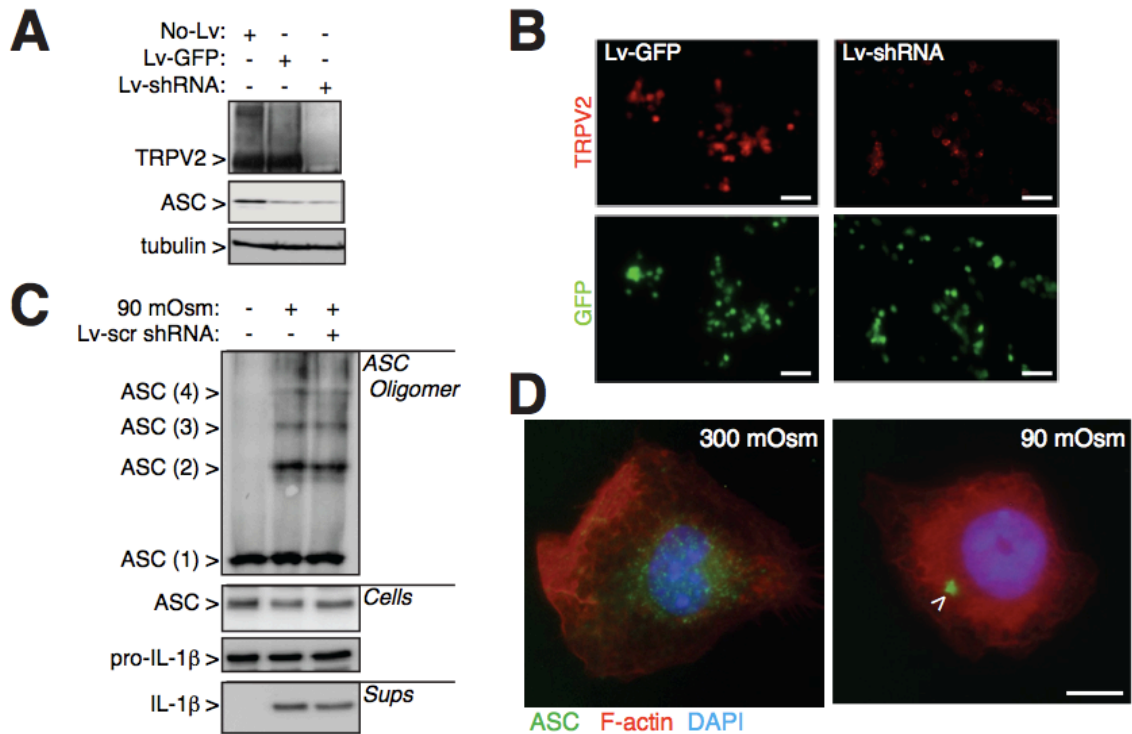

**Figure S3. (A,B)** Effective TRPV2 gene silencing in THP-1 cells. **(A)** Western blot for TRPV2, ASC and tubulin from THP-1 lysate of control non-infected cells (No-Lv), GFP-lentivirus infected cells (Lv-GFP) or cells infected with lentivirus coding for GFP and TRPV2 shRNA (Lv-shRNA). **(B)** TRPV2 immunostaining in THP-1 infected as in (A); scale bar 40  $\mu$ m. **(C)** ASC and IL-1 $\beta$  Western blot from purified cross-linked ASC oligomer proteins (*ASC Oligomer*), total cell extracts (*Cells*) and cell supernatants (*Sups*) of THP-1 cells infected with lentivirus coding for scramble shRNA sequence primed with LPS and IFN- $\gamma$  (100 ng/ml each, 16 h) and subsequently stimulated with 300 and 90 mOsm of extracellular osmolarity for 60 min. **(D)** Representative pictures of wild type murine peritoneal macrophages primed with LPS (1  $\mu$ g/ml for 4 h) and stained for ASC (green), actin (Phalloidin-Texas red, red) and nuclei (DAPI, blue) after incubation for 40 min in isotonic or hypotonic solution. Scale bar 10  $\mu$ m.
